# Supplementary material
Source: PubMed Central journal article supplement (PMC5106328)
Supplement: NIHMS793987-supplement-Figure_1_Supplementary_data_pdf.pdf [file NIHMS793987-supplement-Figure_1_Supplementary_data_pdf.pdf]

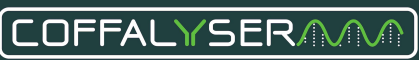

**Sample report: 2 MCH P198 P16048 1-5**

Sample type: Sample | Project: P198 | Experiment: 20160210\_rozc1-5 | Dye: 6-FAM | Performed by: Admin  
 Machine: ABI-3130 | Report date: 2016-02-11 | Run date: 2016-02-11 | Software Version: v.140721.1958 | Normal range: 0,7 - 1,3

|               |
|---------------|
| Authorization |
| Date          |

MLPA probe mix: P198-FH  
 Lot number: A3-1014  
 Sheet date: 2015-12-21 14:48:24  
 Control fragments: CF-003-[brown] QDX2 (A2-0)  
 Analysis method: Block SSC: On  
 Used metric: Peak height

Nr of test probes: 19/19  
 Nr of ref probes: 9/9  
 DNA concentration: OK  
 DNA denaturation: OK  
 Expected gender: Female  
 Residual primer %: OK 8%

FRSS: OK 100%  
 FRMS: OK 100%  
 PSLP: Warning -16%  
 RSO: OK  
 RPQ: Warning  
 CAS: OK? 85%

Reference Samples: 2 MCH P198 PC1 1-5 | 2 MCH P198 PC2 1-5 | 2 MCH P198 PC3 1-5

| D [nt] | Gene-Exon  | Chr.band | hg18 loc.     | Height | Area        | Ratio <sup>H</sup> | Stdev       | [REF] | [Sam] | Width | d[nt] |
|--------|------------|----------|---------------|--------|-------------|--------------------|-------------|-------|-------|-------|-------|
| 184    | FH-10      | 01q43    | 01-239,727612 | 1317   | 8785        | <b>0,38</b>        | 0,04        | <<*   | ?     | 39    | 0,0   |
| 202    | FH-9       | 01q43    | 01-239,730022 | 1685   | 11050       | <b>0,39</b>        | 0,04        | <<*   | ?     | 39    | 0,1   |
| 238    | FH-8       | 01q43    | 01-239,732397 | 1294   | 9324        | <b>0,44</b>        | 0,05        | <<*   | <*    | 56    | 0,1   |
| 166    | FH-7       | 01q43    | 01-239,733894 | 1416   | 8553        | <b>0,37</b>        | 0,04        | <<*   | ?     | 29    | 0,0   |
| 220    | FH-6       | 01q43    | 01-239,735933 | 1418   | 8803        | <b>0,44</b>        | 0,04        | <<*   | <*    | 30    | 0,0   |
| 291    | FH-5       | 01q43    | 01-239,738565 | 1436   | 10071       | <b>0,51</b>        | 0,06        | <<*   | <*    | 31    | 0,1   |
| 256    | FH-4       | 01q43    | 01-239,741875 | 1452   | 10032       | <b>0,48</b>        | 0,06        | <<*   | <*    | 60    | 0,1   |
| 178    | FH-3       | 01q43    | 01-239,743469 | 1415   | <b>9210</b> | <b>0,41</b>        | 0,04        | <<*   | ?     | 36    | 0,0   |
| 247    | FH-2       | 01q43    | 01-239,747094 | 1426   | 12059       | <b>0,48</b>        | 0,05        | <<*   | <*    | 85    | 0,0   |
| 152    | FH-1       | 01q43    | 01-239,749610 | 1240   | 7630        | <b>0,36</b>        | 0,04        | <<*   | ?     | 22    | -0,1  |
| 283    | Reference* | 02q14.3  | 02-127,901245 | 2468   | 17524       | 1                  | 0,1         | =     | =     | 43    | 0,1   |
| 214    | Reference* | 03q29    | 03-194,826570 | 3990   | 26271       | 1,23               | <b>0,12</b> | =     | =     | 46    | 0,1   |
| 191    | Reference* | 04p16.3  | 04-001,865410 | 3184   | 20822       | 0,98               | 0,09        | =     | =     | 42    | 0,0   |
| 265    | Reference* | 05p15.31 | 05-009,490899 | 3409   | 22963       | 1,18               | <b>0,12</b> | =     | =     | 34    | 0,0   |
| 142    | Reference* | 06p12.2  | 06-052,052694 | 3997   | 24648       | 0,92               | 0,09        | =     | =     | 51    | 0,0   |
| 172    | Reference* | 09p13.3  | 09-034,638740 | 3525   | 22197       | 0,9                | 0,09        | =     | =     | 34    | 0,0   |
| 161    | Reference* | 10q26.13 | 10-124,142683 | 4144   | 28052       | 1,01               | 0,1         | =     | =     | 55    | 0,0   |
| 300    | Reference* | 13q14.3  | 13-051,409733 | 2585   | 19400       | 1,1                | <b>0,11</b> | =     | =     | 56    | 0,1   |
| 229    | Reference* | 16p13.3  | 16-002,053004 | 2621   | 17857       | 0,93               | 0,1         | =     | =     | 59    | 0,1   |

Median value all probe values:

|             |              |              |             |           |             |
|-------------|--------------|--------------|-------------|-----------|-------------|
| <b>1685</b> | <b>12059</b> | <b>0,51*</b> | <b>0,06</b> | <b>42</b> | <b>0,03</b> |
|-------------|--------------|--------------|-------------|-----------|-------------|

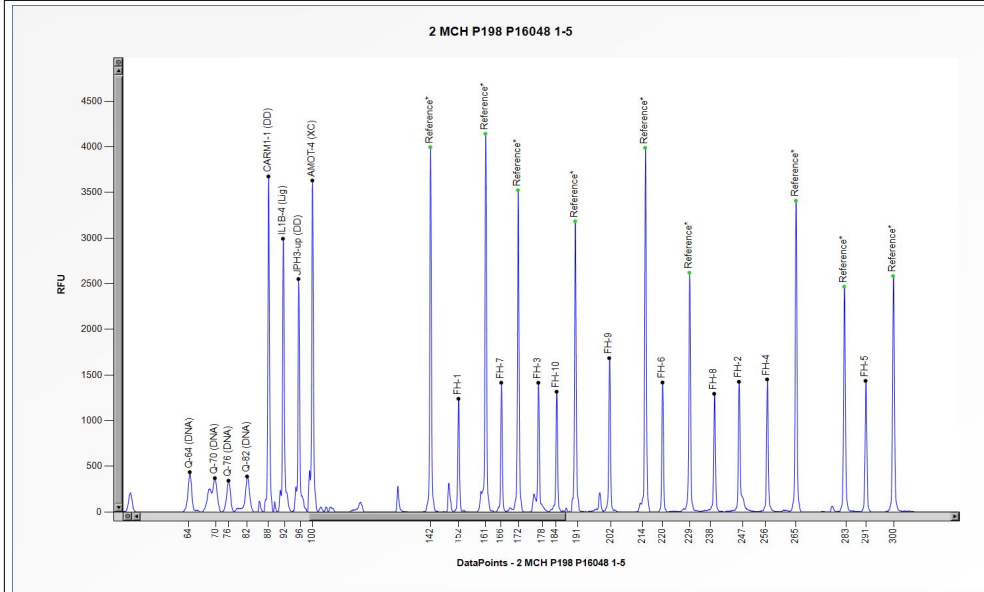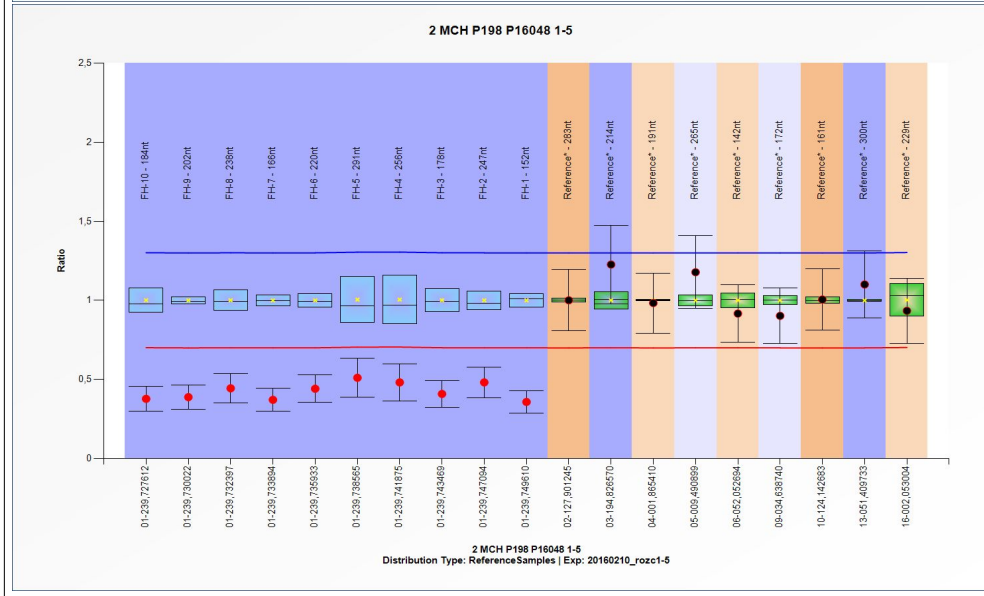

Normal range: 0,7 - 1,3 Essential information on the use of this product is present in the product description which is available on <http://www.mlpa.com>. For questions, <mailto:info@mlpa.com>.  
 MRC-Holland does not and cannot warrant the performance or results you may obtain by using the software. In no event will MRC-Holland be liable for any damages, claims or costs whatsoever or any consequential, indirect, incidental, damages, or any lost profits or lost savings, even if an MRC-Holland representative has been advised of the possibility of such loss, damages, claims or costs.
