# Supplementary material
Source: PubMed Central journal article supplement (PMC5106328)

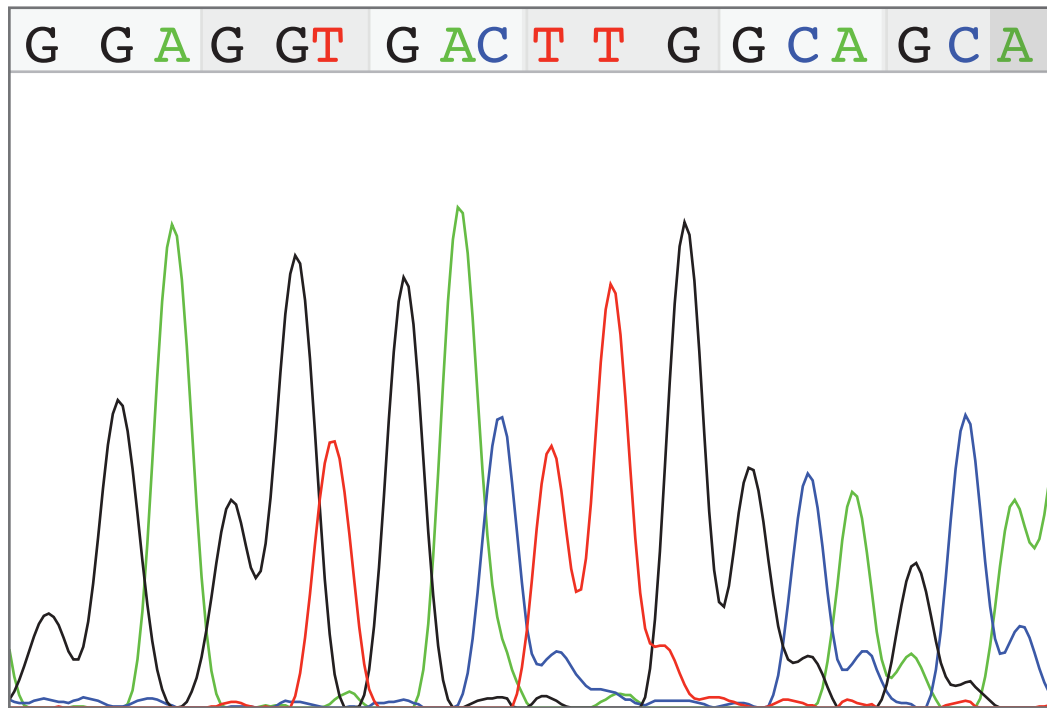

Supplement: NIHMS793987-supplement-Figure_2_supplementary_data_pdf.pdf [file NIHMS793987-supplement-Figure_2_supplementary_data_pdf.pdf]
